# Supplementary material for: Existence of log-phase Escherichia coli persisters and lasting memory of a starvation pulse
Source: Life Sci Alliance. 2021 Nov 18;5(2):e202101076. doi: 10.26508/lsa.202101076 (PMC8605324; doi:10.26508/lsa.202101076)
Supplement: Supplementary file 2 [file LSA-2021-01076_TableS2.xls]

## Sheet: Sheet1
Experiment	Toriginal	Tcorrected	log10(surv. frac.)original	log10(surv. frac.)corrected
A	6.96	6	-4.166	-3.961
B	6.93	6	-4.337	-4.162
C	7	6	-3.764	-3.604
C	17.8	21	-4.602	-4.75
C	41.5	45	-5.681	-5.811
C	66.3	69	-6.602	-6.68
C	90.6	93	-7.301	-7.309
C	114.6	117	-7.38	-7.349
C	138	141	-7.079	-7.082
Table S2. Data corrected due to deviating sampling protocol. The corrected values are used for calculation of statistical values and to perform test for differences between datapoints of the various conditions. The last datapoint in experiment C is not corrected, since there was no following datapoint to use for the correction, but here it is assumed that little change happened during 3 h, compar…
